# Supplementary material
Source: publisher figshare collection journal article supplement (https://brill.figshare.com/ndownloader/files/40297108)
Supplement: Supplementary file 1 [file 40297108]

# **Audio-Visual Cross-Modal Correspondences of Perceived Urgency: Examination through a Speeded Discrimination Task**

**Kiichi Naka<sup>1, 2, \*</sup> and Katsuya Yamauchi<sup>3</sup>**

<sup>1</sup>Graduate School of Design, Kyushu University, 4-9-1 Shiobaru, Minami-ku, Fukuoka 815-8540, Japan

<sup>2</sup>Faculty of Engineering, Fukuoka University, 8-19-1 Nanakuma, Jonan-ku, Fukuoka 814-0180, Japan

<sup>3</sup>Faculty of Design, Kyushu University, 4-9-1 Shiobaru, Minami-ku, Fukuoka 815-8540, Japan

\*Corresponding author; e-mail: [naka.kiichi.research@gmail.com](mailto:naka.kiichi.research@gmail.com)

ORCID iDs: Naka: 0000-0001-6476-0058; Yamauchi: 0000-0003-1942-3663

**Supplementary Material**
